# Supplementary material for: Exploiting additive and subtractive patterning for spatially controlled and robust bacterial co-cultures
Source: Royal Society of Chemistry journal article supplement (doi:10.1039/c2sm26111a), 2012-01-01
Supplement: c2sm26111a.pdf [file c2sm26111a.pdf]

## Exploiting Additive and Subtractive Patterning for Spatially Controlled and Robust Bacterial Co-Cultures

Cait M. Costello,<sup>†</sup> Jan-Ulrich Kreft,<sup>§</sup> Christopher M. Thomas,<sup>§</sup> Daniel M. Hammes,<sup>§</sup> Peng Bao,<sup>‡</sup> Stephen D. Evans,<sup>‡</sup> Paula M. Mendes<sup>†,\*</sup>

<sup>†</sup>*School of Chemical Engineering and* <sup>§</sup>*School of Biosciences, University of Birmingham, Edgbaston, Birmingham, B15 2TT, UK.*

<sup>‡</sup>*School of Physics and Astronomy, University of Leeds, Woodhouse Lane, Leeds, LS2 9JT, UK.*

To whom correspondence may be addressed. E-mail: [p.m.mendes@bham.ac.uk](mailto:p.m.mendes@bham.ac.uk)

### SUPPORTING INFORMATION

---

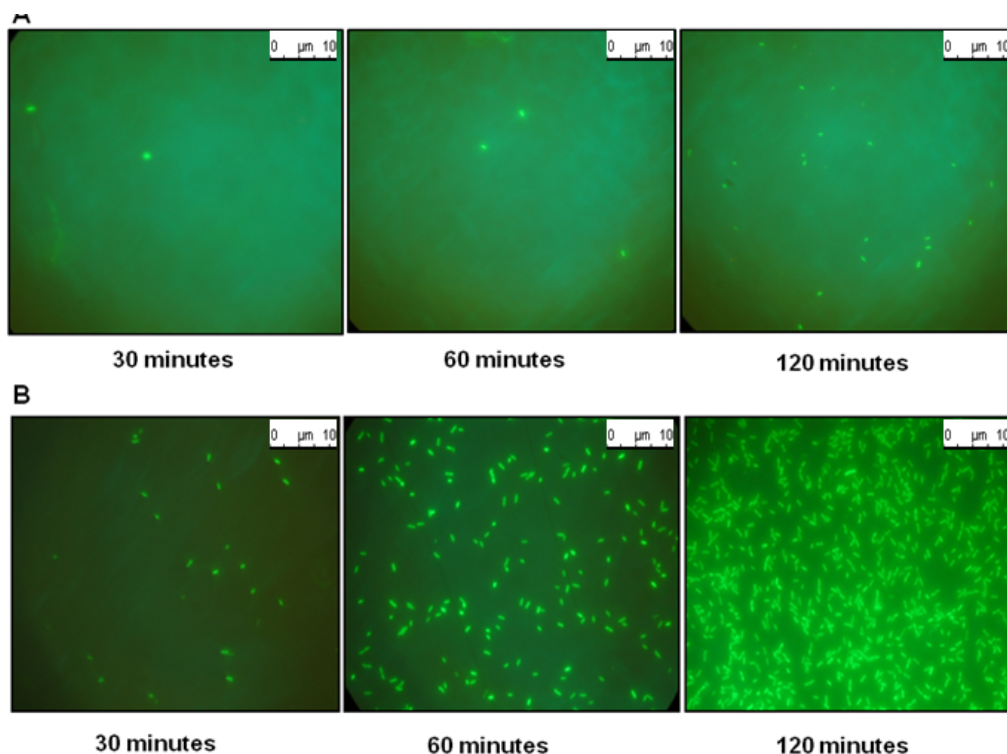

**Fig S1:** Fluorescence microscope images of bacterial adhesion to COOH-SAMs (A) and MT SAMs (B) over time.
